# Supplementary material for: In vitro–in vivo–in silico simulation studies of anti-tubercular drugs doped with a self nanoemulsifying drug delivery system
Source: Royal Society of Chemistry journal article supplement (doi:10.1039/c6ra14122f), 2016-01-01
Supplement: c6ra14122f1.pdf [file c6ra14122f1.pdf]

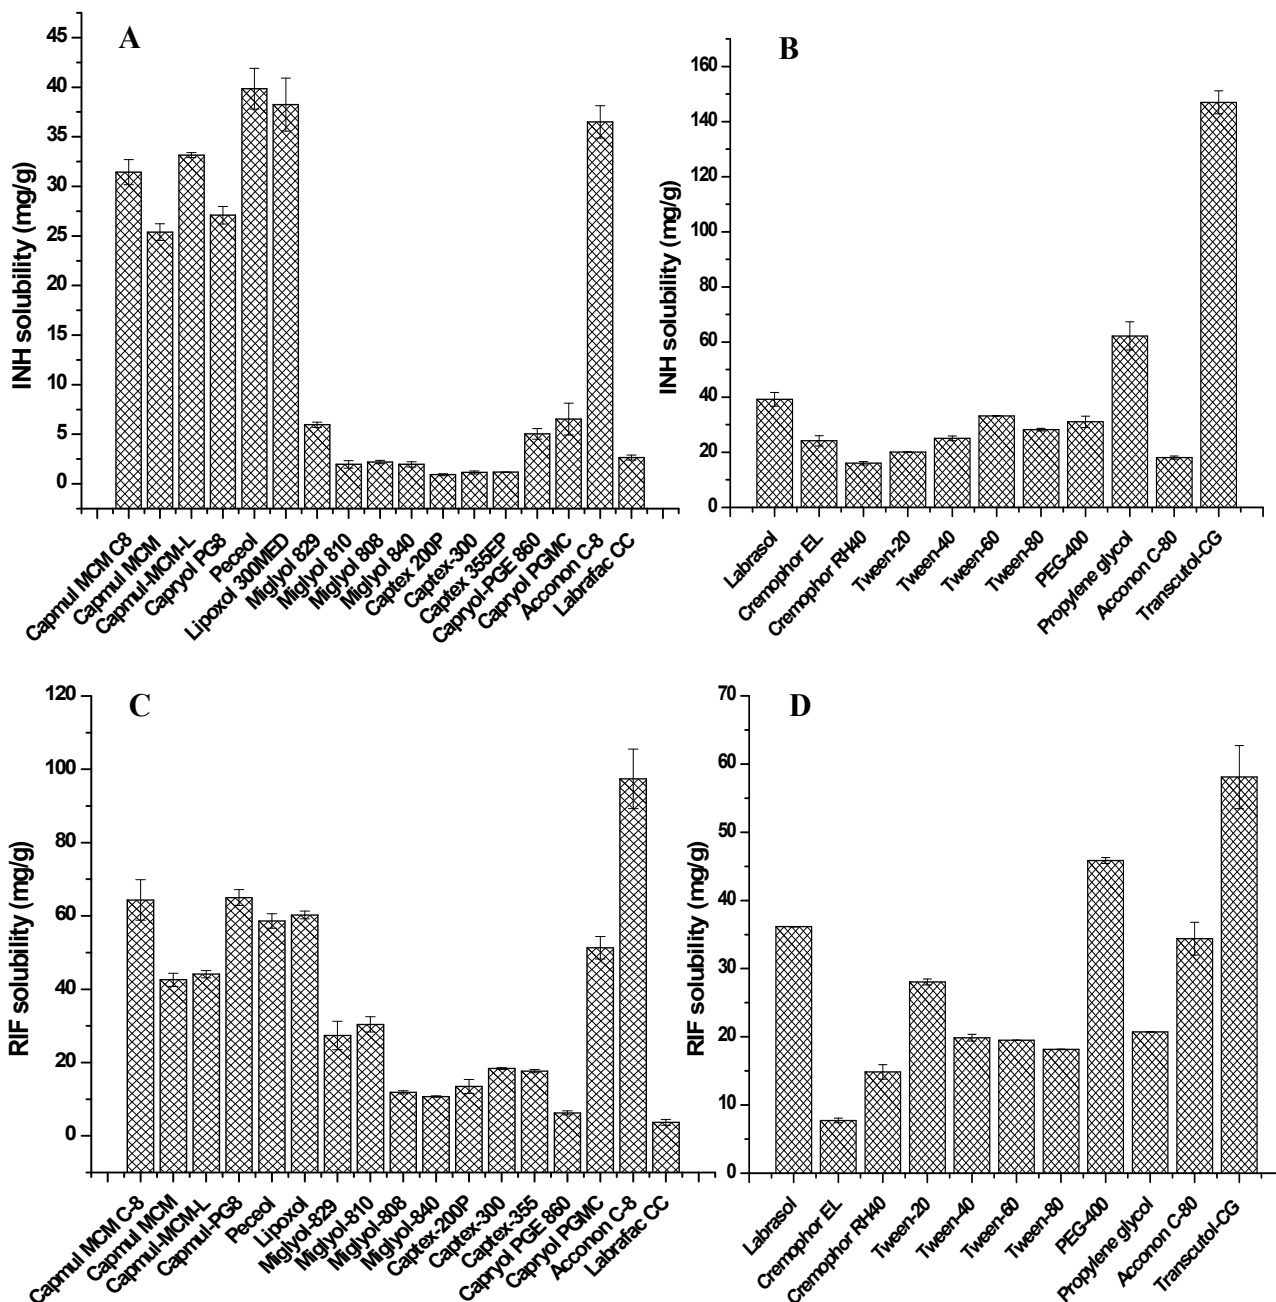

**Supplementary Figure S1:** The solubility values of drugs in various potential excipients: INH in lipids (A), INH in surfactants (B), RIF in lipids (C) and RIF in surfactants (D)

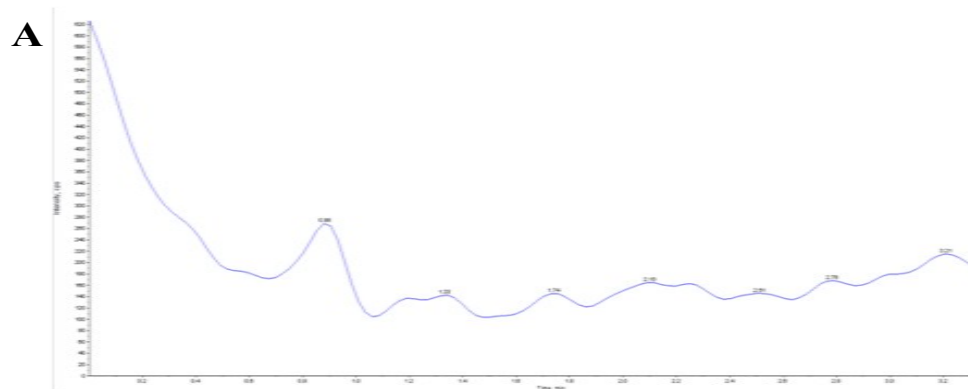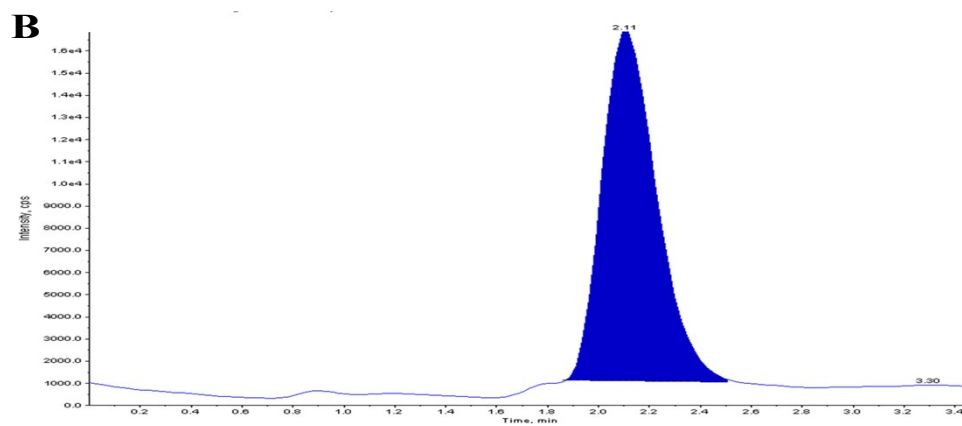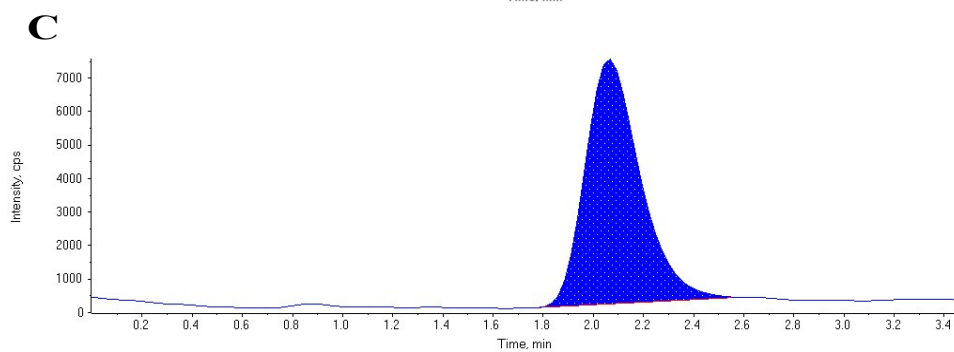

**Supplementary Figure 2:** Representative LC-MS/MS chromatograms: (A) blank plasma, (B) RIF spiked in rat plasma of standard calibration sample and (C) RIF in rat plasma at 4 hrs after oral administration of RIF-OF1.

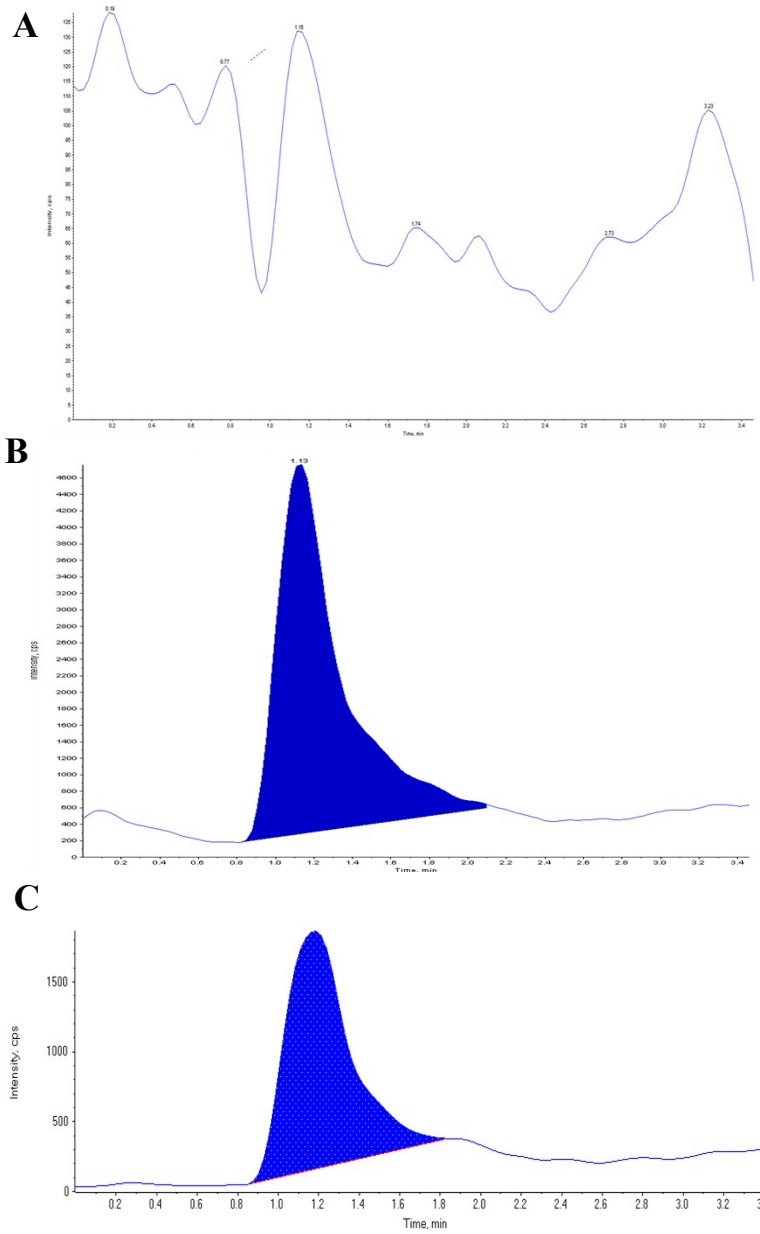

**Supplementary Figure 3:** Representative LC-MS/MS chromatograms: (A) Blank plasma, (B) INH spiked in rat plasma of standard calibration sample and (C) INH in rat plasma at 4 hrs after oral administration of INH-OF1

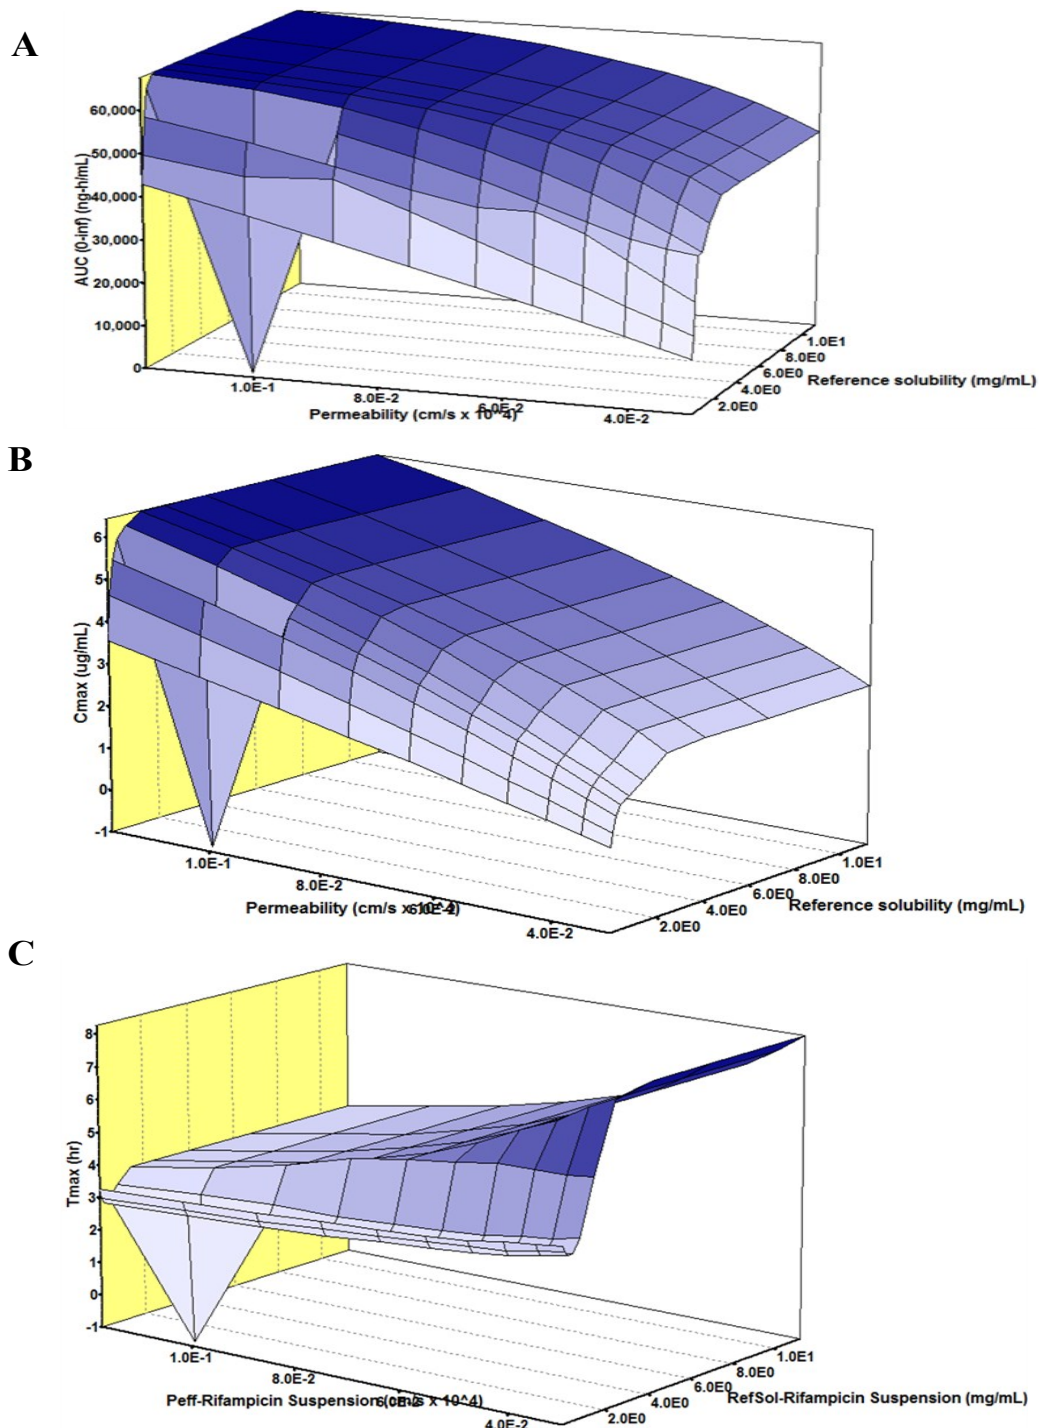

**Supplementary Figure 4:** 3-Dimensional parameter sensitivity analysis (PSA) to assess the effect of drug solubility and permeability on major PK parameters of RIF suspension ( $C_{max}$ , AUC and  $T_{max}$ ) determined from the *in silico* Gastroplus™ simulation software: (A) effect on AUC in 3-D, (B) effect on  $C_{max}$  in 3-D plot and (C) effect of RIF suspension on  $T_{max}$  in 3-dimensional plots

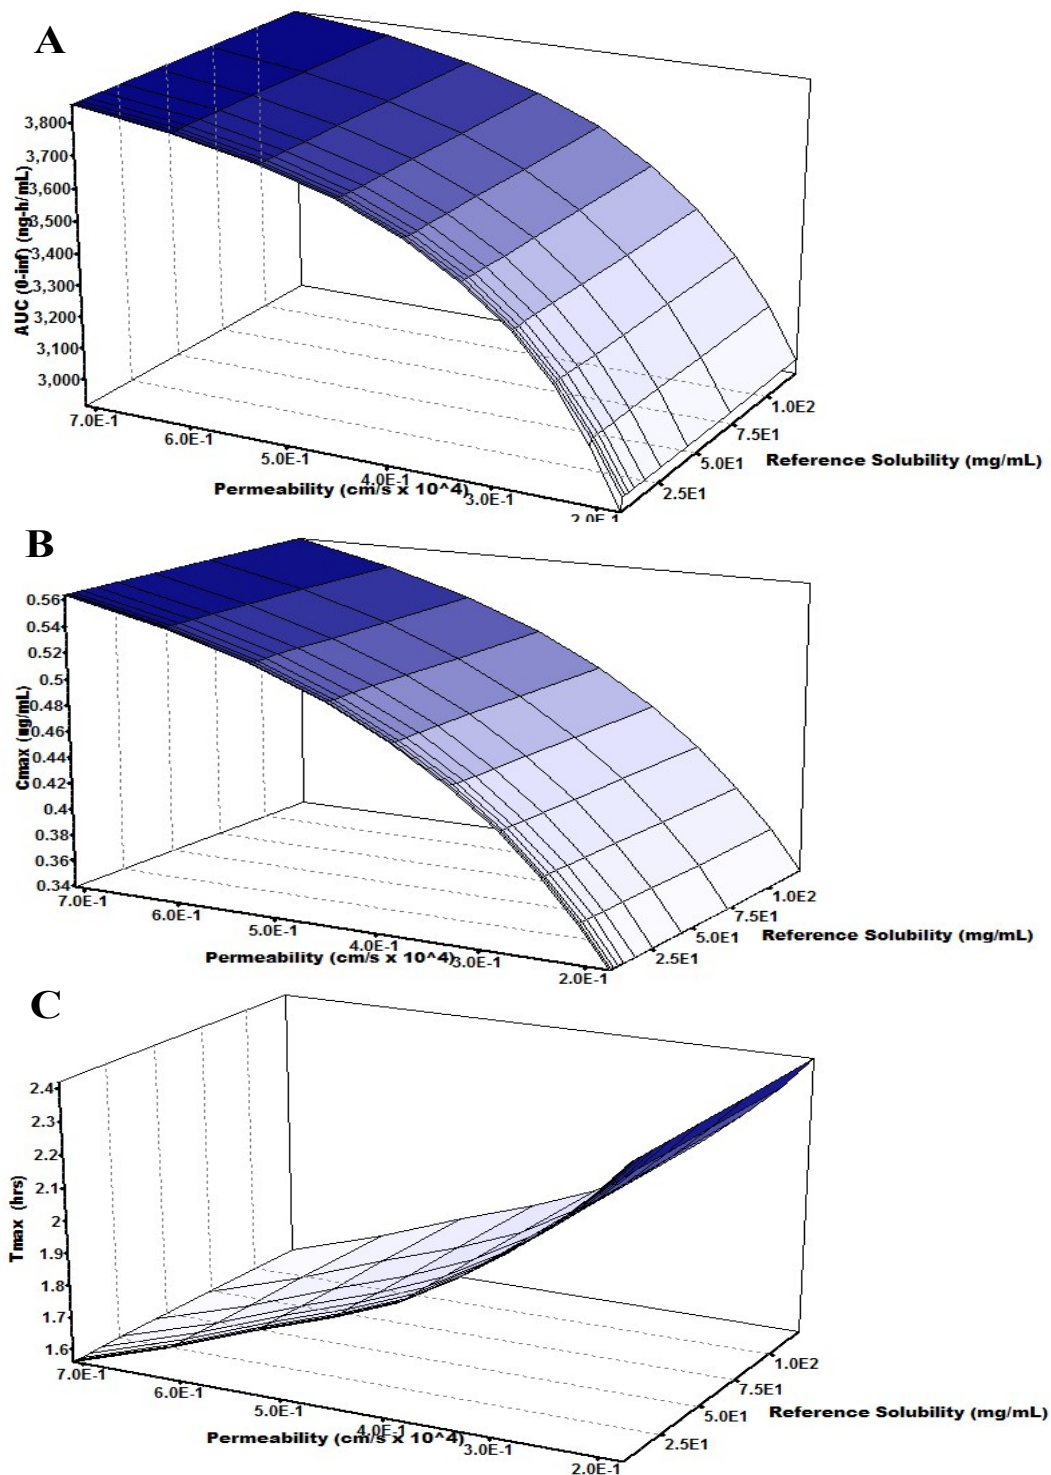

**Supplementary Figure 5:** 3-Dimensional parameter sensitivity analysis (PSA) to assess the effect of drug solubility and permeability on major PK parameters of INH OF1 ( $C_{\text{max}}$ , AUC and  $T_{\text{max}}$ ) determined from the *in silico* Gastroplus™ simulation software (3-Dimensional plots): (A) effect on AUC, (B) effect on  $C_{\text{max}}$  and (C) effect on  $T_{\text{max}}$

**Supplementary Table S1: Selection of RIF-SNEDDS and INH-SNEDDS formulations**

| Formulations | Homogeneous blend reconstituted in aqueous media (10 ml) |             |               |                     |                            |
|--------------|----------------------------------------------------------|-------------|---------------|---------------------|----------------------------|
|              | Drug (mg)                                                | Homogeneous | Precipitation | Dispersibility test | Emulsification time (sec)* |
| RIF-OF1      | 40                                                       | √           | ×             | Grade A             | 12±1.1                     |
|              | 80                                                       | √           | ×             | Grade A             | 19± 1.7                    |
|              | 100                                                      | √           | ×             | Grade A             | 24 ±2.4                    |
|              | 150                                                      | √           | ×             | Grade A             | 32 ±2.8                    |
|              | 175                                                      | ×           | √             | Grade C             | 74±5.4                     |
| RIF-OF2      | 40                                                       | √           | ×             | Grade A             | 15±0.8                     |
|              | 80                                                       | √           | ×             | Grade A             | 17±1.2                     |
|              | 100                                                      | √           | ×             | Grade A             | 29±2.5                     |
|              | 150                                                      | √           | ×             | Grade A             | 41±4.2                     |
|              | 175                                                      | ×           | √             | Grade C             | 88±8.4                     |
| RIF-OF3      | 40                                                       | √           | ×             | Grade A             | 16±1.0                     |
|              | 80                                                       | √           | ×             | Grade A             | 20±1.5                     |
|              | 100                                                      | √           | ×             | Grade A             | 34±3.6                     |
|              | 150                                                      | √           | ×             | Grade A             | 52±5.6                     |
|              | 175                                                      | ×           | √             | Grade C             | 117±12.6                   |
| INH-OF1      | 25                                                       | √           | ×             | Grade A             | 6.3±0.5                    |
|              | 50                                                       | √           | ×             | Grade A             | 6.8±0.2                    |
|              | 75                                                       | √           | ×             | Grade A             | 11.9±1.1                   |
|              | 100                                                      | ×           | ×             | Grade A             | 25.7±3.2                   |
| INH-OF2      | 25                                                       | √           | ×             | Grade A             | 8.21±1.0                   |
|              | 50                                                       | √           | ×             | Grade A             | 12.9±1.2                   |
|              | 75                                                       | √           | ×             | Grade A             | 17.9±1.8                   |
|              | 100                                                      | ×           | ×             | Grade A             | 32.4±4.5                   |
| INH-OF3      | 25                                                       | √           | ×             | Grade A             | 14.8±2.2                   |
|              | 50                                                       | √           | ×             | Grade A             | 27.2±3.7                   |
|              | 75                                                       | √           | ×             | Grade A             | 35.6±4.7                   |
|              | 100                                                      | ×           | ×             | Grade B             | 45.9±8.1                   |

\*Value represented as mean±standard deviation (n=3, ±sd)

**Supplementary Table S2:** Comparison of MIC values against different *Mycobacterium* species by CFU (colony forming unit/ml) techniques

| Formulations    | Minimum inhibitory concentration (C) <sup>a</sup> |                                           |                                                          |
|-----------------|---------------------------------------------------|-------------------------------------------|----------------------------------------------------------|
|                 | <i>Mycobacterium smegmatis</i> (MTCC 995)         | <i>Mycobacterium smegmatis</i> (MTCC 942) | <i>M. tuberculosis</i> H <sub>37</sub> Rv (ATCC (25618)) |
|                 | MIC                                               | MIC                                       | MIC                                                      |
| RIF (µg/ml)     | 0.5±0.04                                          | 1.0±0.04                                  | 0.2±0.01                                                 |
| INH (µg/ml)     | 0.31±0.05                                         | 0.62±0.03                                 | 0.4±0.01                                                 |
| CMC8 (mg/ml)    | 12.5±0.5                                          | 18.75±0.8                                 | 18.4±1.5                                                 |
| LAB (mg/ml)     | 25.0±1.0                                          | 25.0±1.0                                  | 30.8±7.4                                                 |
| OF1 (mg/ml)     | 9.14±1.1                                          | 8.6±0.4                                   | 8.8±0.56                                                 |
| RIF-OF1 (µg/ml) | 0.025±0.001                                       | 0.05±0.002                                | 0.02±0.001                                               |
| INH-OF1 (µg/ml) | 0.05±0.002                                        | 0.1±0.02                                  | 0.04±0.001                                               |

<sup>a</sup>Values are mean ± SD (mm) from the experiments in triplicate. RIF, INH, CMC8, LAB and OF1 stand for rifampicin, isoniazid, capmul MCM C8, labrasol and optimized formulation OF1 respectively.
